# Supplementary material for: Fluorene-based novel gold(i) complexes with aggregation-induced emission (AIE) or aggregate fluorescence change characteristics: from green to white emission
Source: Royal Society of Chemistry journal article supplement (doi:10.1039/c4ra14972f), 2015-01-01

## **Electronic Supplementary Information (ESI)**

### **Fluorene-based novel gold(I) complexes with aggregation-induced emission (AIE) or aggregate fluorescence change characteristics: from green to white emission**

Zhao Chen, Xie Han, Jing Zhang, Di Wu, Guang-Ao Yu\*, Jun Yin and Sheng Hua Liu\*

Key Laboratory of Pesticide and Chemical Biology, Ministry of Education, College of

Chemistry, Central China Normal University, Wuhan 430079, PR China

Tel: +86-27-67867725 Fax: +86-27-67867725

Corresponding author E-mail: yuguang@mail.ccnu.edu.cn; chshliu@mail.ccnu.edu.cn

#### Contents

|                                                |           |
|------------------------------------------------|-----------|
| 1. Figs. S1-S6.....                            | <b>S2</b> |
| 2. Copies of NMR spectra and Mass spectra..... | <b>S4</b> |

## 1. Figs. S1-S6

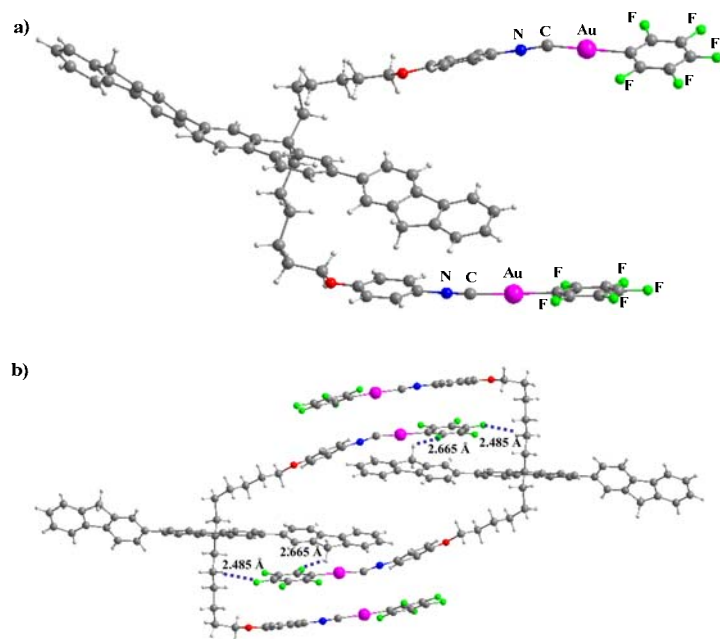

Figure S1 a) The single crystal structure of complex 4. b) Crystal packing diagram of complex 4. It showed weak interactions of intermolecular C-H...F.

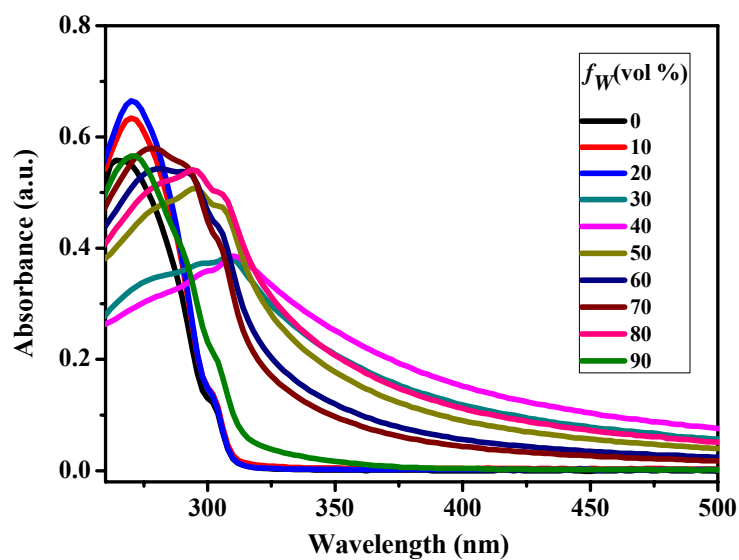

Figure S2 UV-Vis absorption spectra of **1** ( $1.0 \times 10^{-5}$  mol L<sup>-1</sup>) in DMF-water mixtures with different volume fractions of water (0-90%).

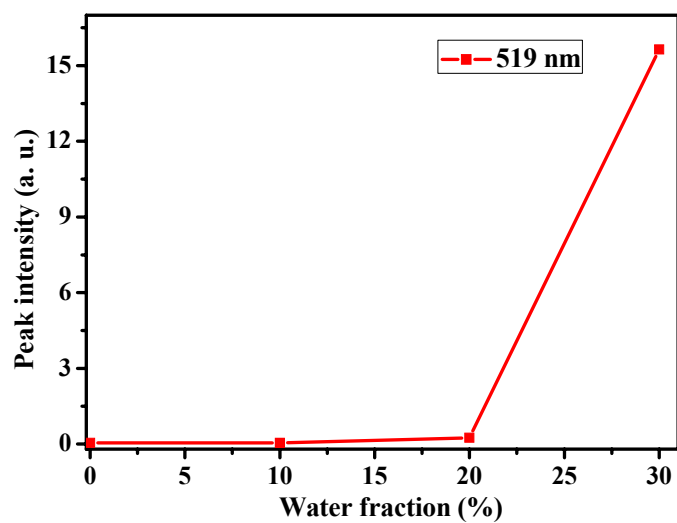

Figure S3 The changes in emission maximum peak of **1** ( $1.0 \times 10^{-5}$  mol L<sup>-1</sup>) in DMF-water mixtures with different volume fractions of water (0% -30%).

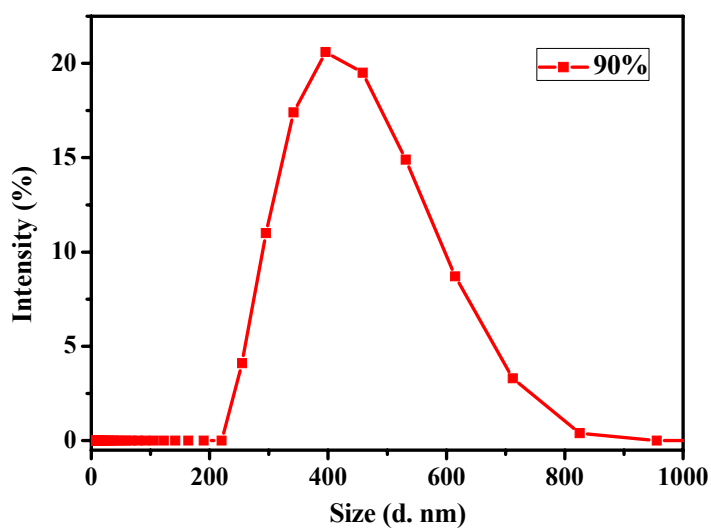

Figure S4 Size distribution curves of complex **1** ( $1.0 \times 10^{-5}$  mol L<sup>-1</sup>) in DMF-water mixtures with 90% volume fraction of water.

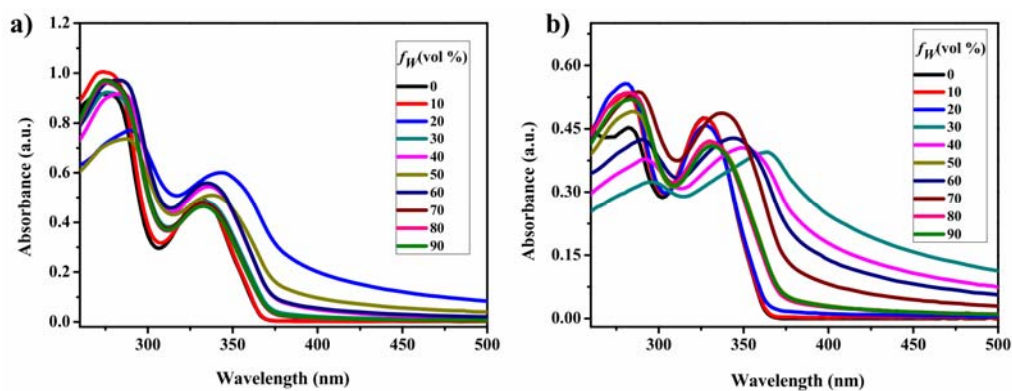

Figure S5 a) UV-Vis absorption spectra of **2** ( $1.0 \times 10^{-5}$  mol L<sup>-1</sup>) in DMF-water mixtures with different volume fractions of water (0-90%). b) UV-Vis absorption spectra of **3** ( $1.0 \times 10^{-5}$  mol L<sup>-1</sup>) in DMF-water mixtures with different volume fractions of water (0-90%).

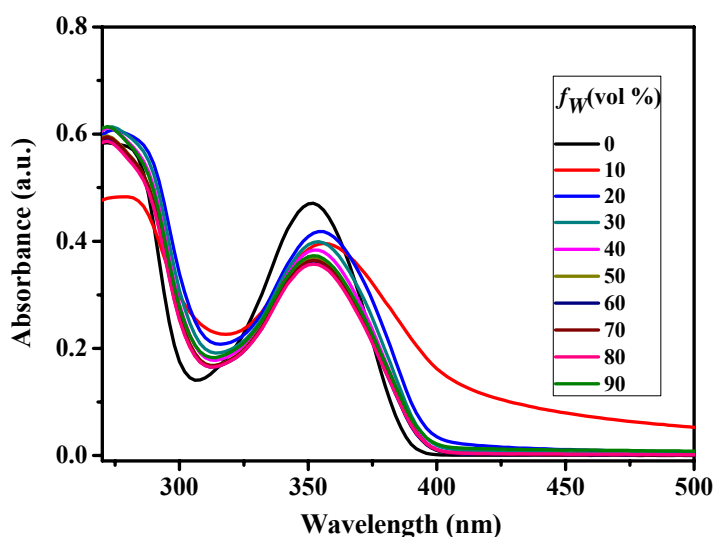

Figure S6 UV-Vis absorption spectra of **5** ( $1.0 \times 10^{-5}$  mol L<sup>-1</sup>) in DMF-water mixtures with different volume fractions of water (0-90%).

## 2. Copies of NMR spectra and Mass spectra

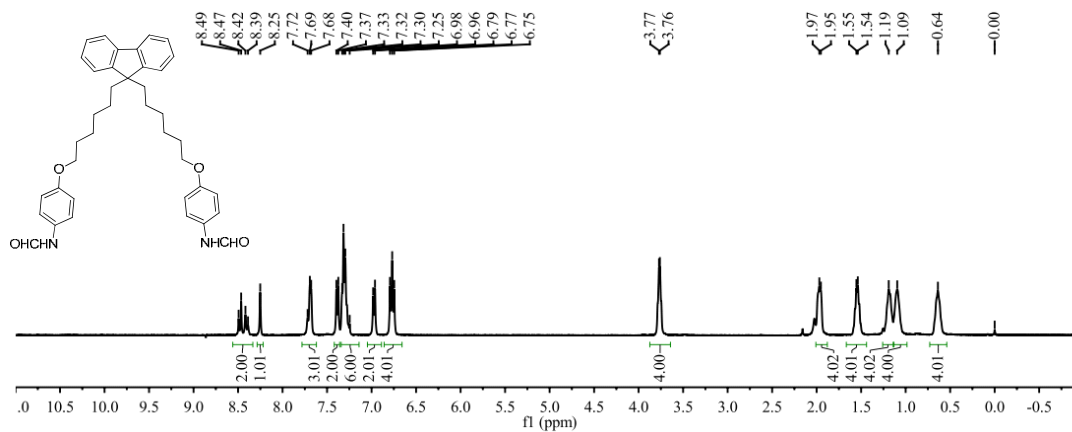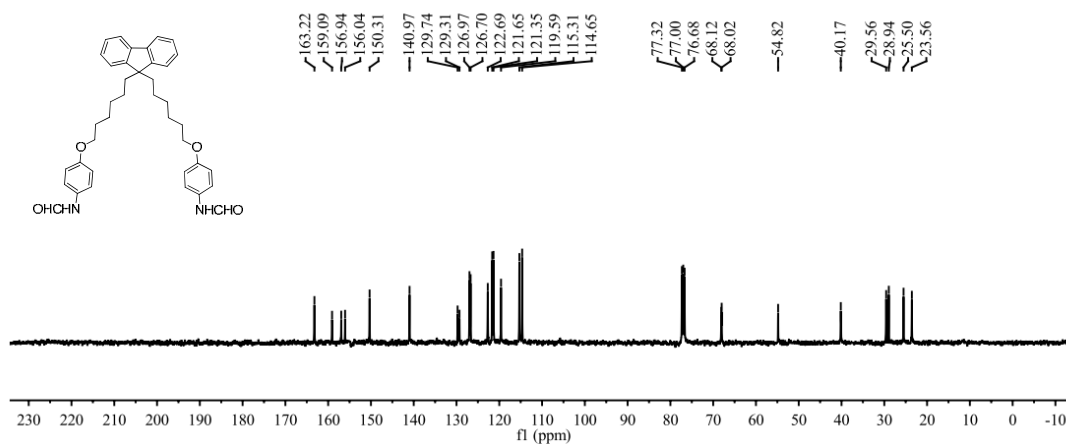

CZ224 #463 RT: 4.09 AV: 1 SB: 466 0.13-3.73, 4.16-4.63 NL: 7.65E4  
T: +c Fullms [40.00-950.00]

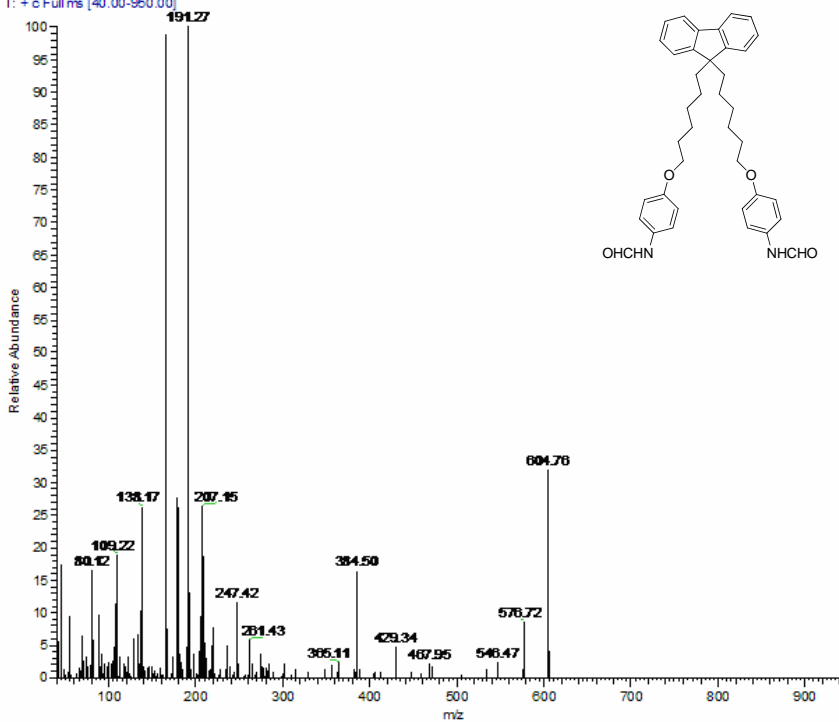

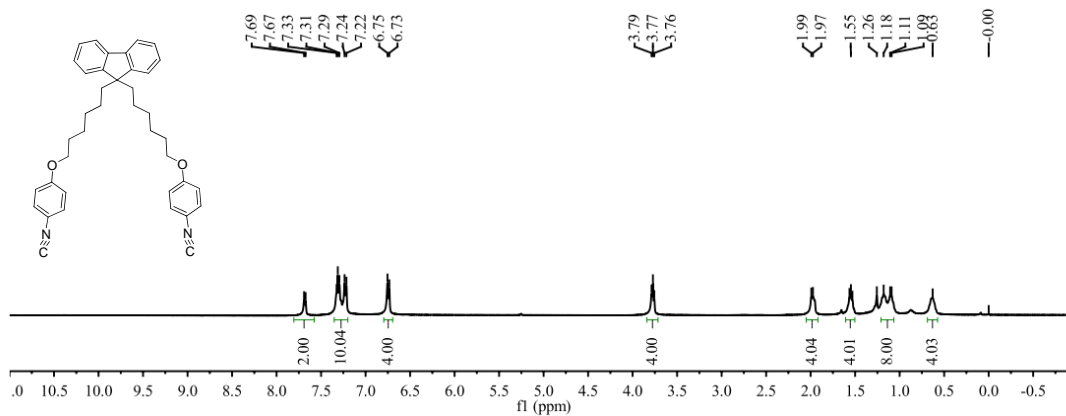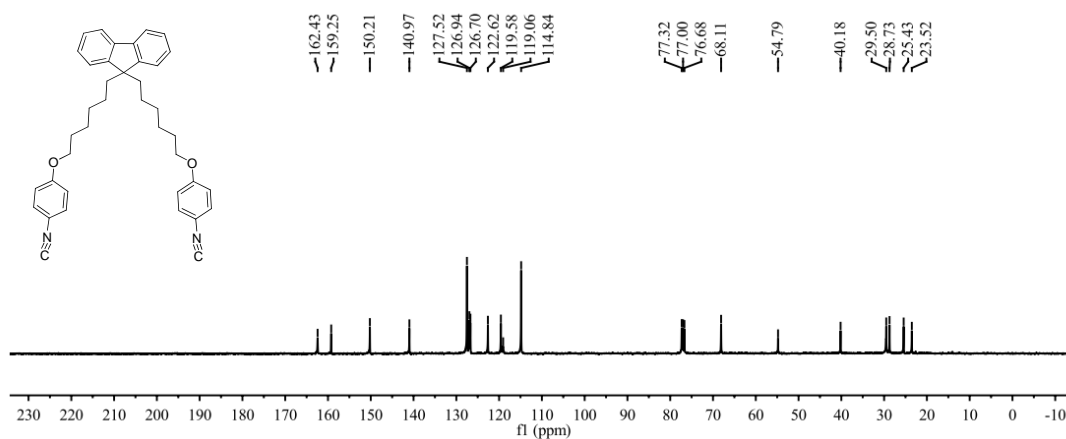

CZ226 #325 RT: 2.88 AV: 1 SB: 347 0.04-2.72 ,3.38-3.72 NL: 1.59E6  
T: + c Fullms [40.00-950.00]

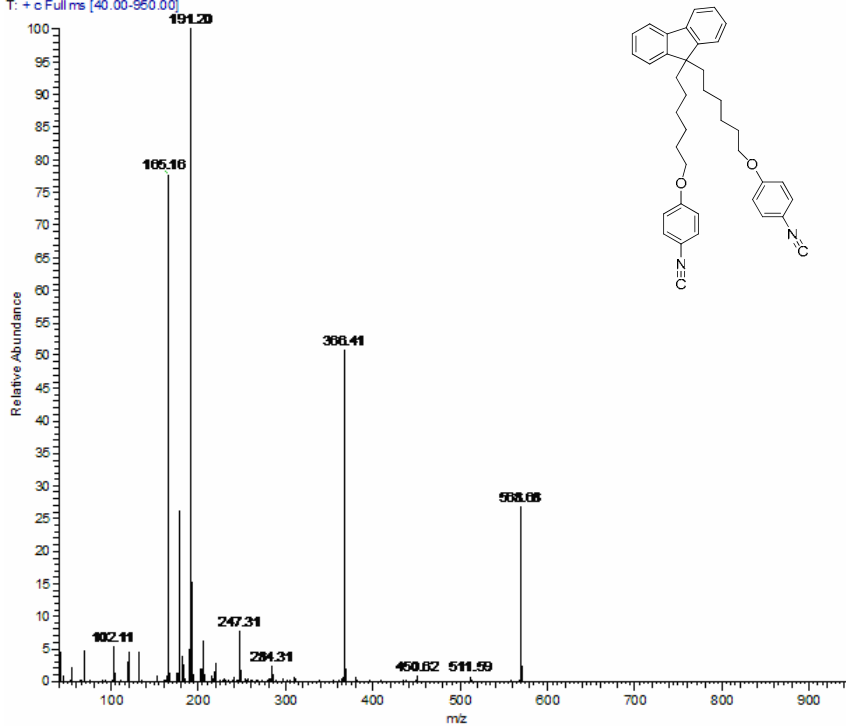

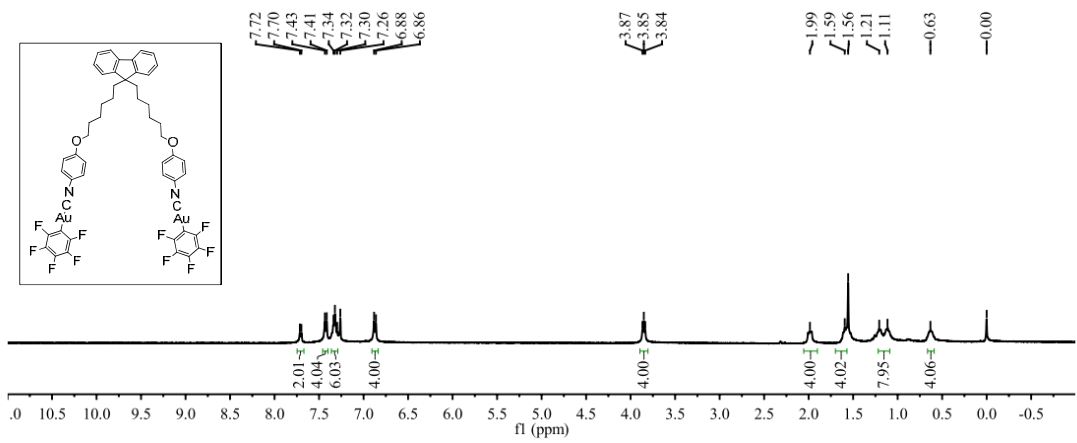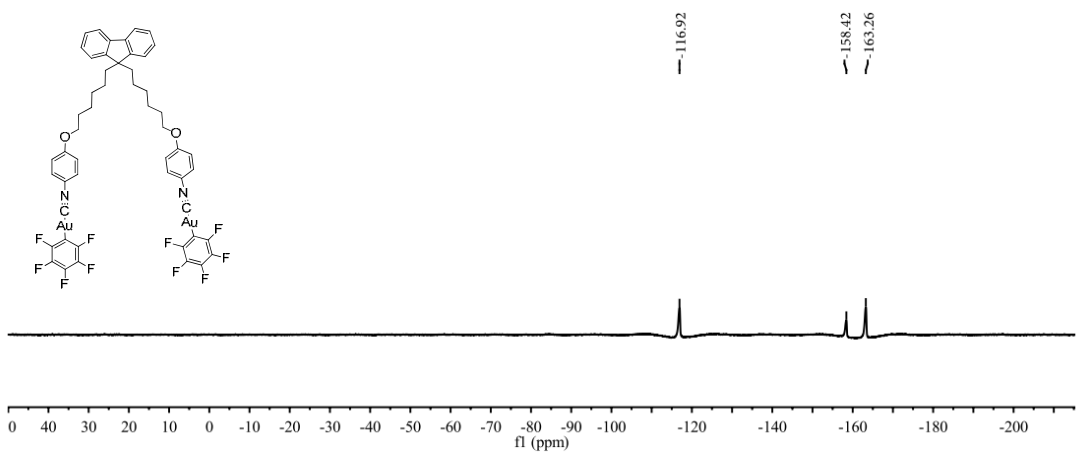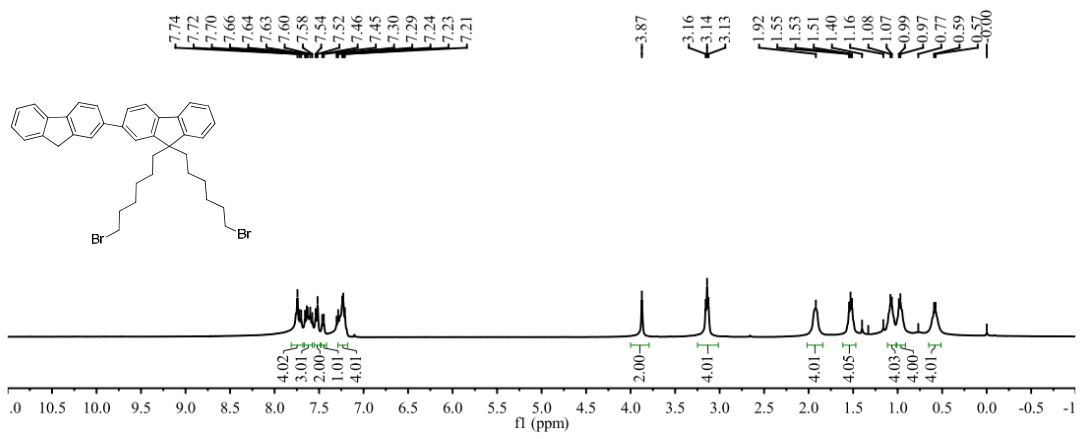

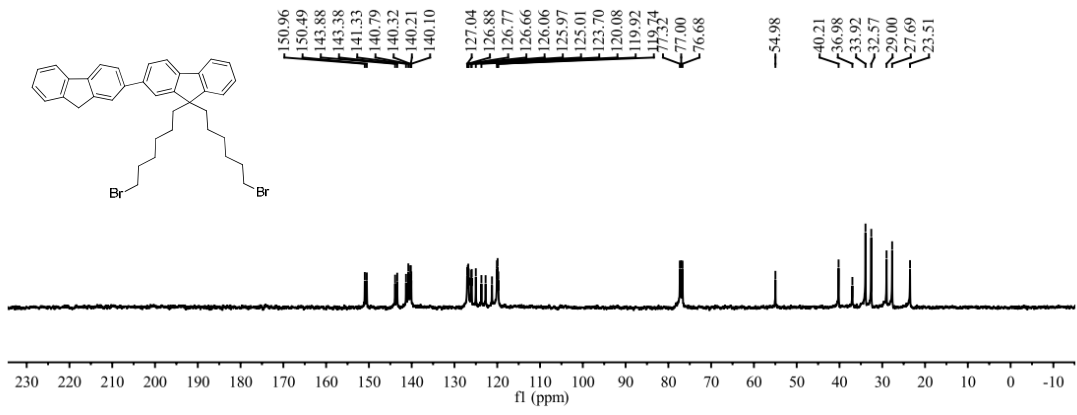

CZ196 #368 RT: 3.18 AV: 1 SB: 356 0.04-2.65, 3.97-4.46 NL: 1.34E5  
T: + c Full ms [40.00-950.00]

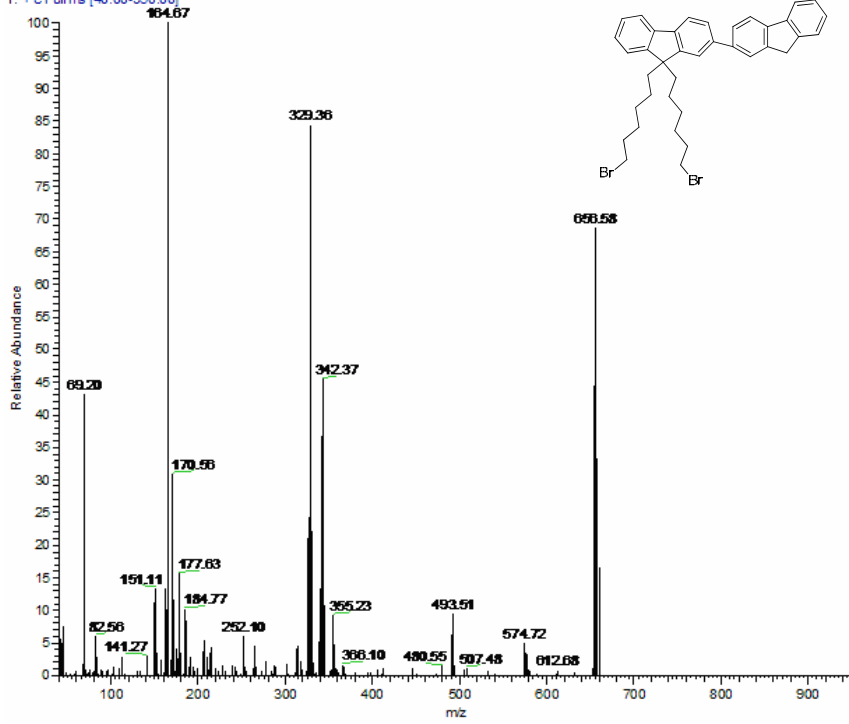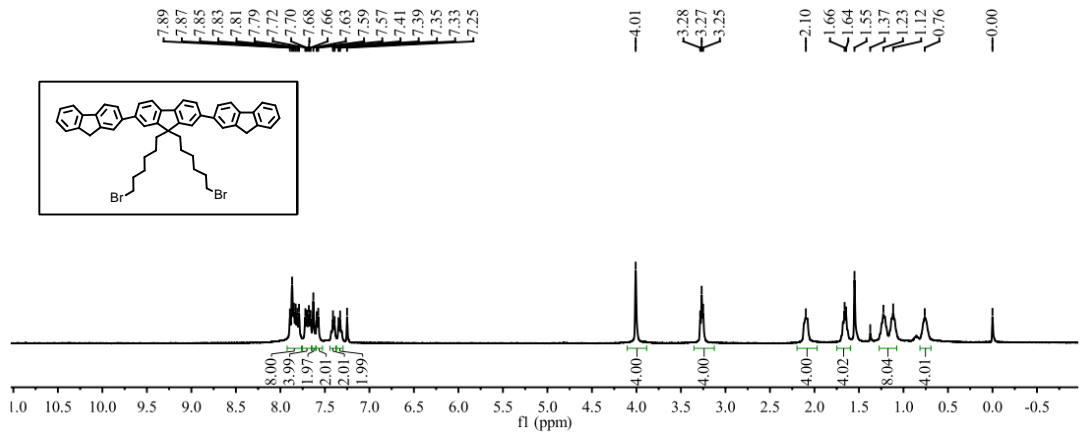



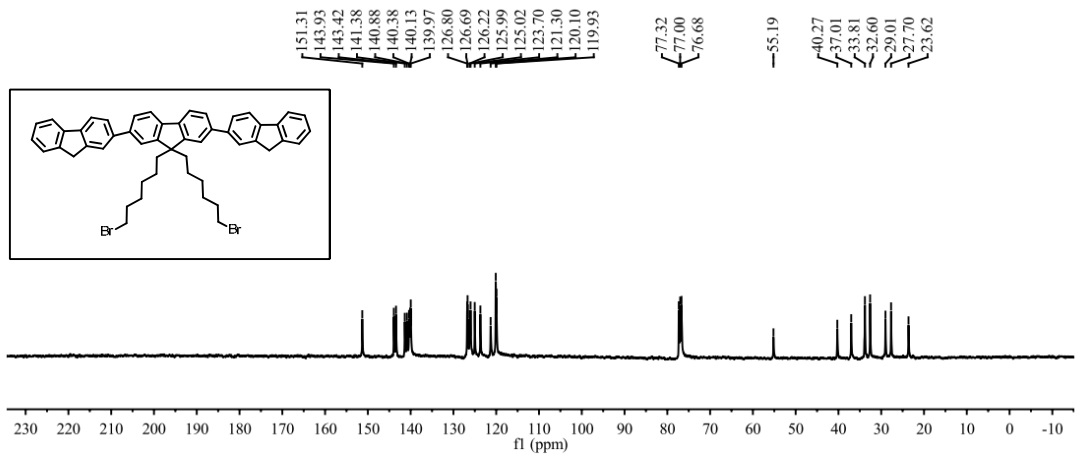

CZ206 #430 RT: 3.80 AV: 1 SB: 484 0.04-3.72, 4.22-4.77 NL: 3.55E4  
T: + c Full ms [40.00-950.00]

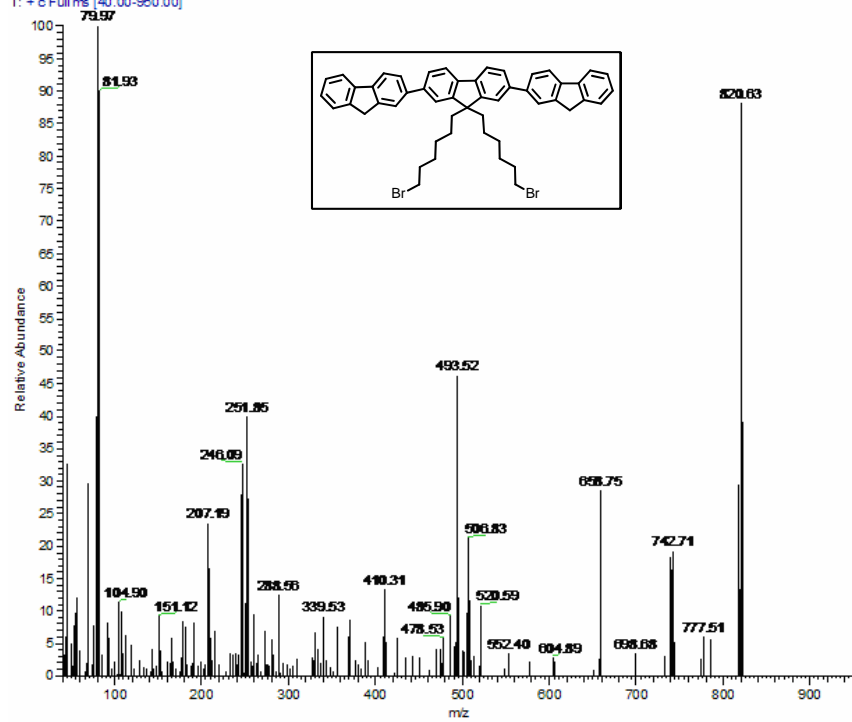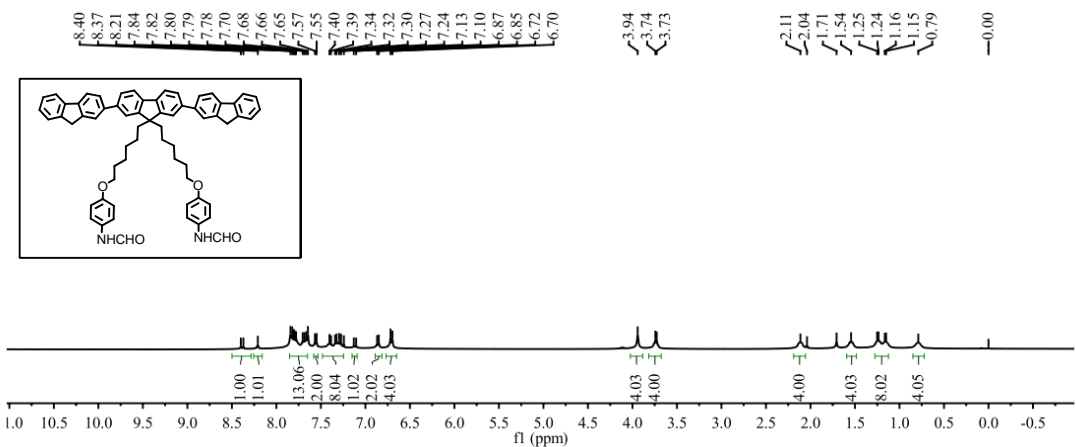

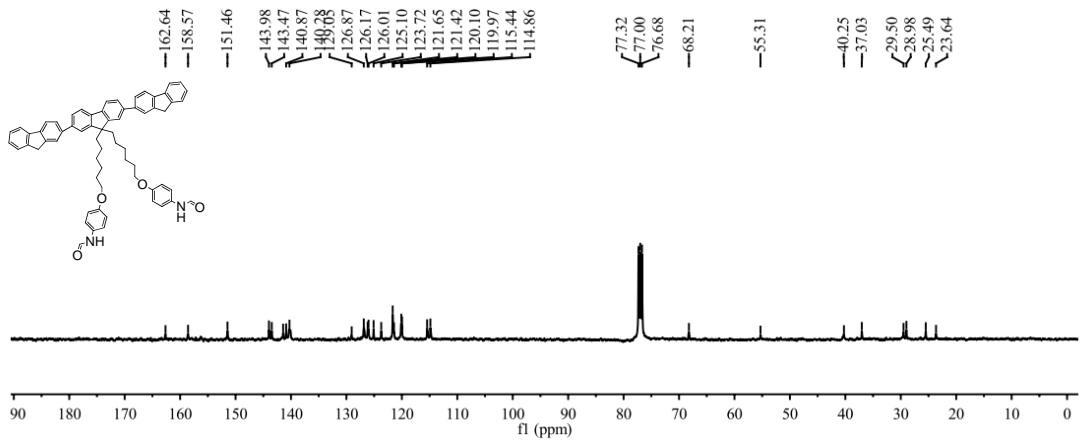

CZ207 #556 RT: 5.06 AV: 1 SB: 508 0.04-4.09 ,5.30-5.83 NL: 8.79E3  
T: +cFullms [40.00-980.00]

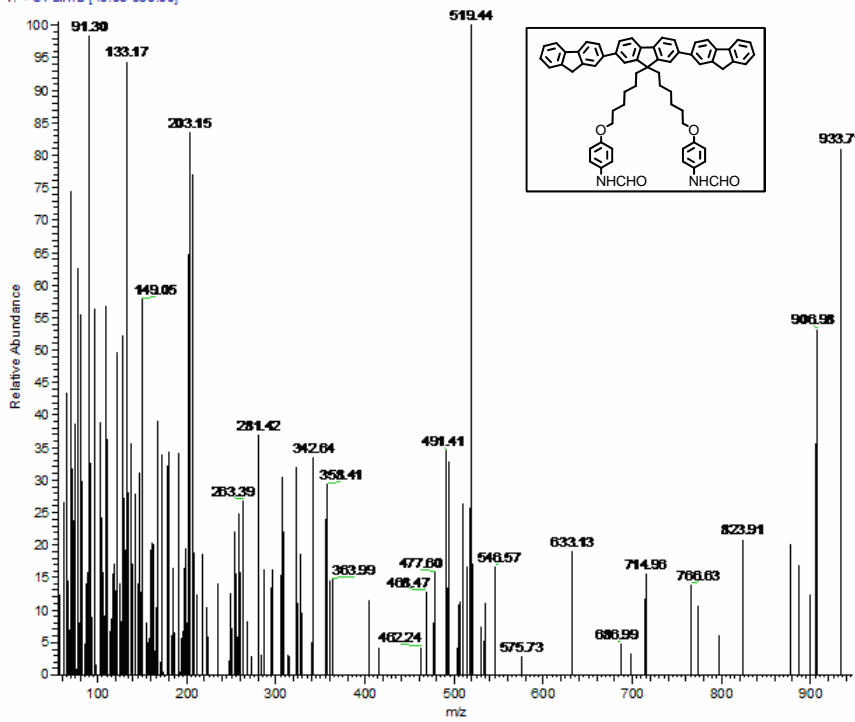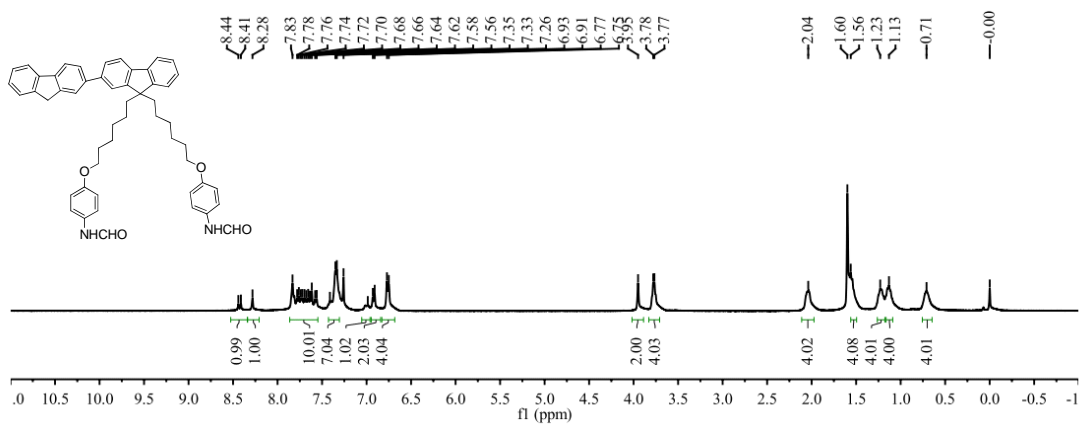

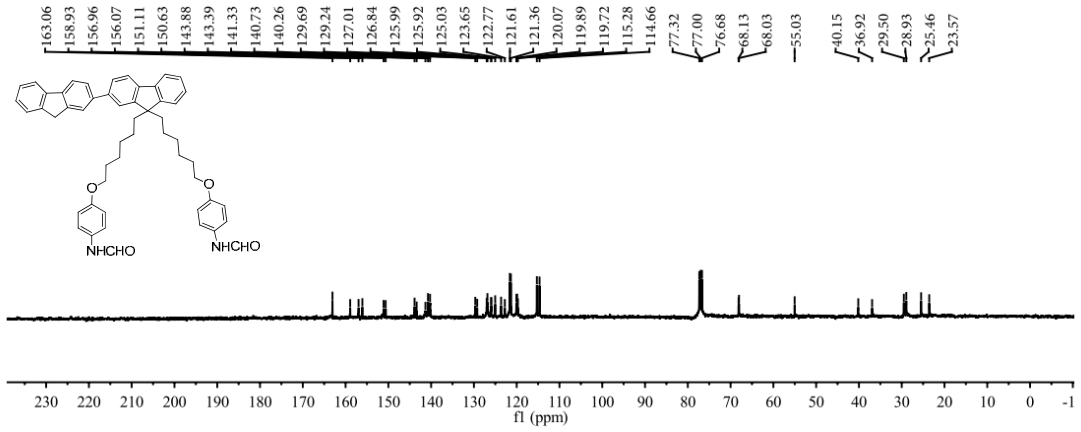

CZ210 #485 RT: 4.42 AV: 1 SB: 544 0.04-4.26 ,4.61-5.30 NL: 1.48E4  
T: +c Full ms [40.00-980.00]

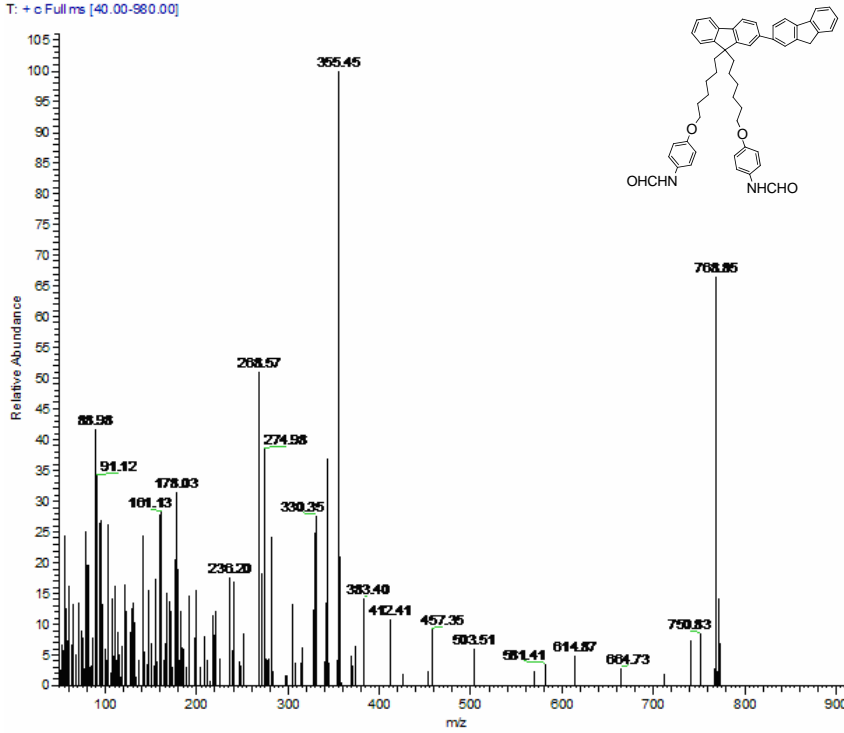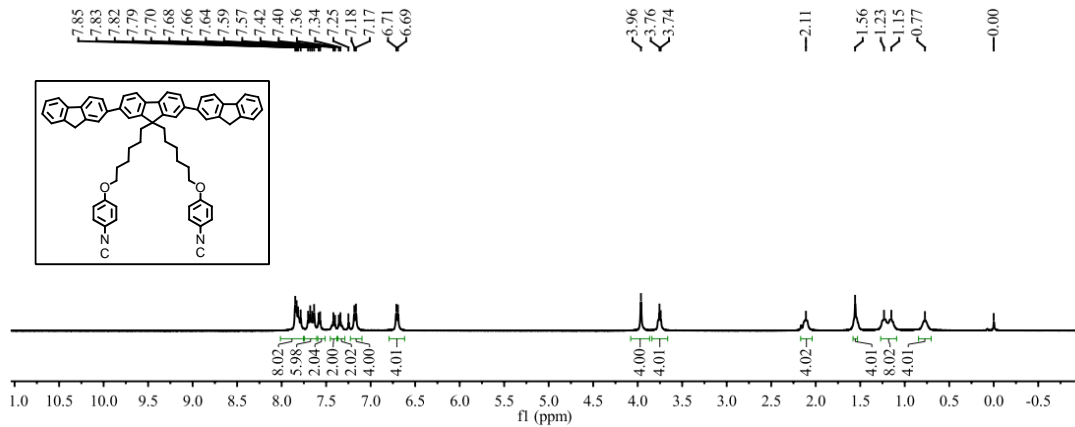

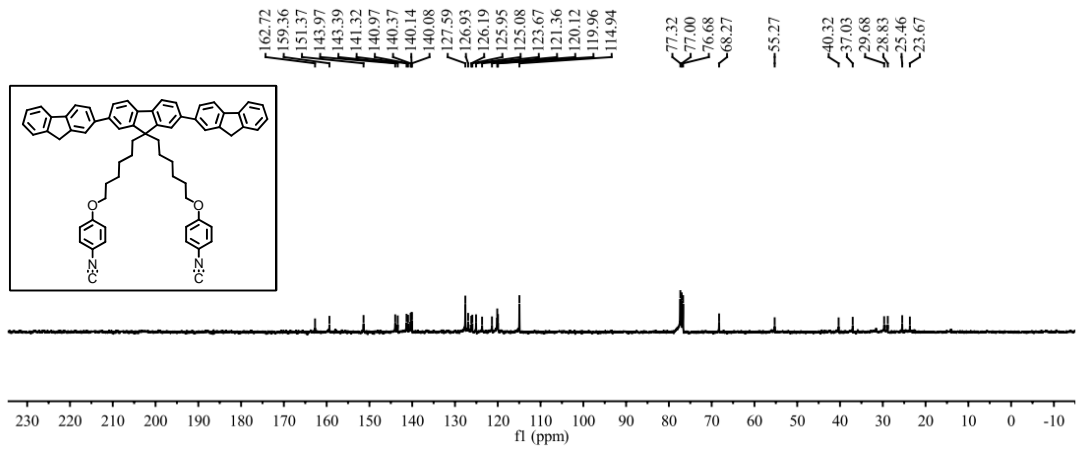

CZ208 #470 RT: 4.15 AV: 1 SB: 569 0.04-4.11 , 5.20-8.10 NL: 1.33E4  
T: +c Fullms [40.00-950.00]

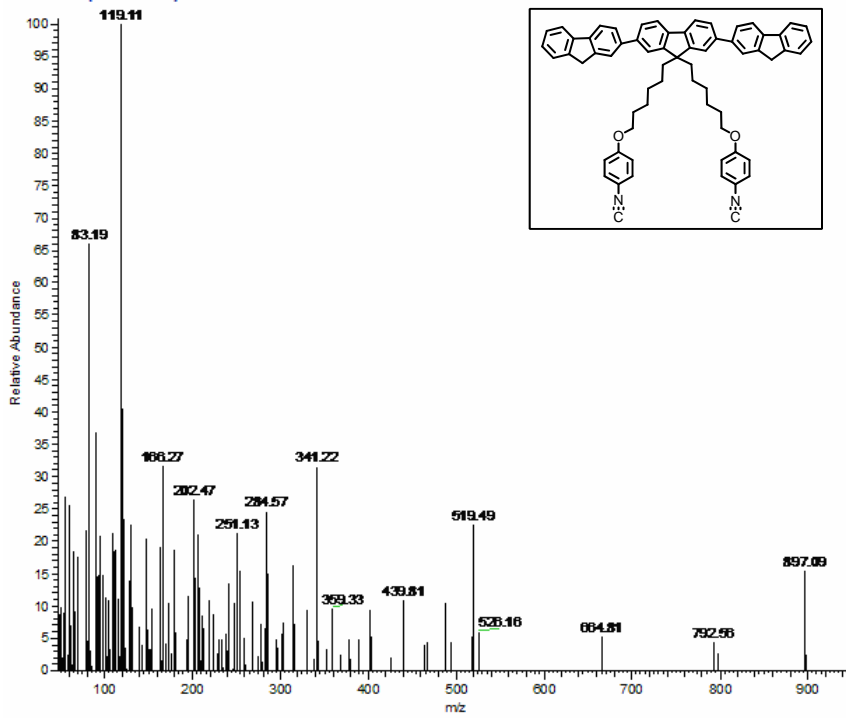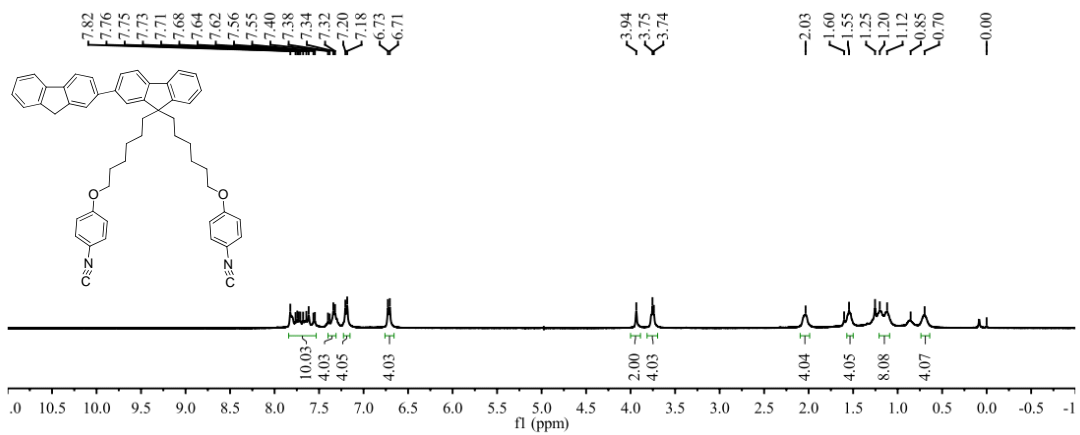

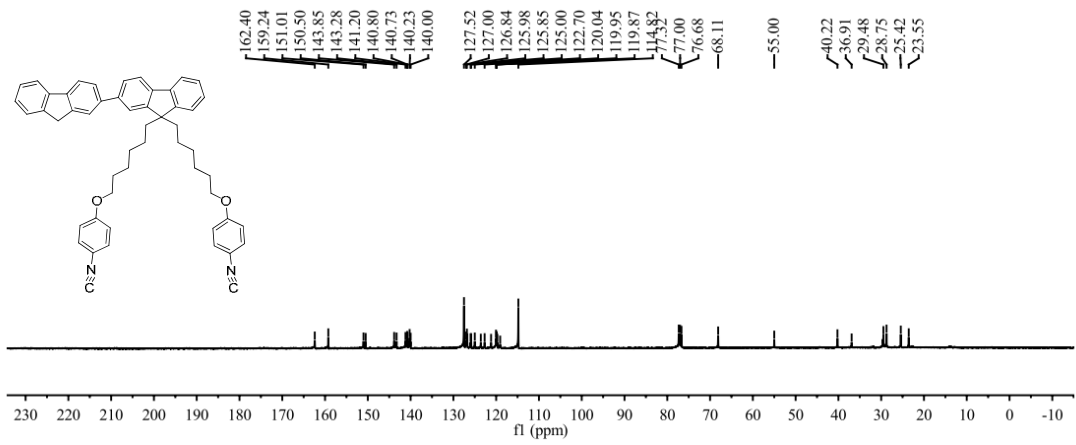

CZ:213 #500 RT: 4.18 AV: 1 SB: 299 0.09-2.15, 4.47-4.87 NL: 9.37E3  
T: + e Full ms [40.00-900.00]

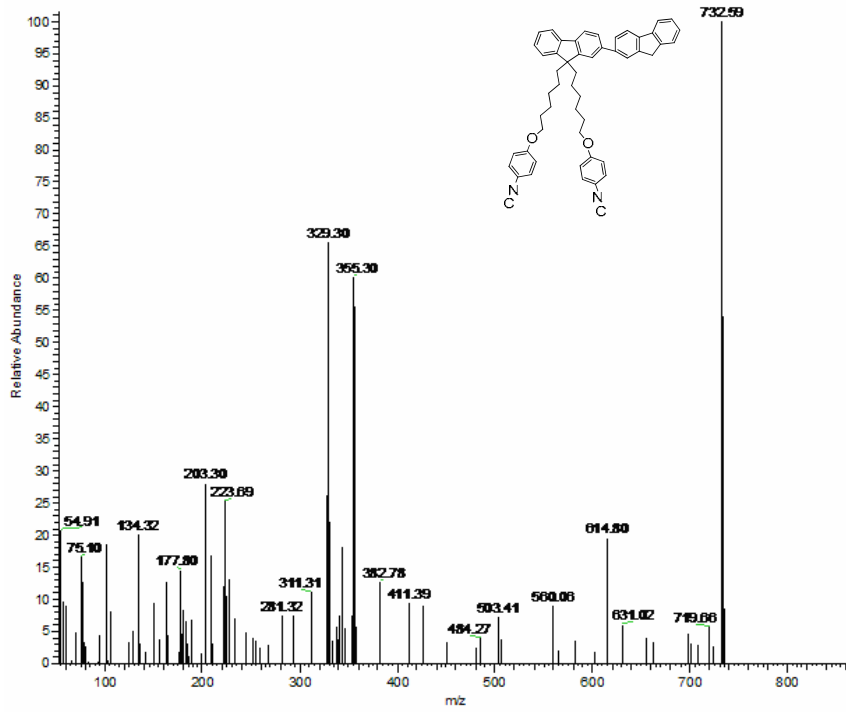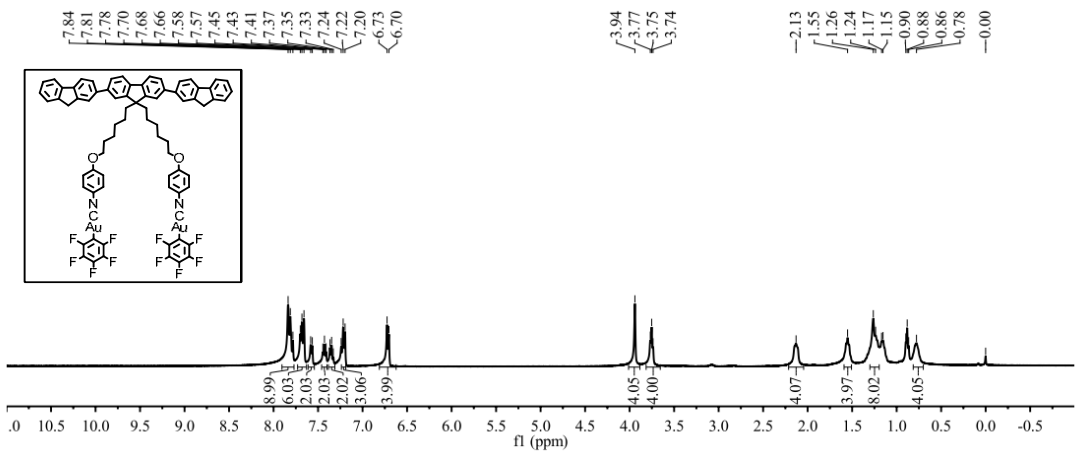

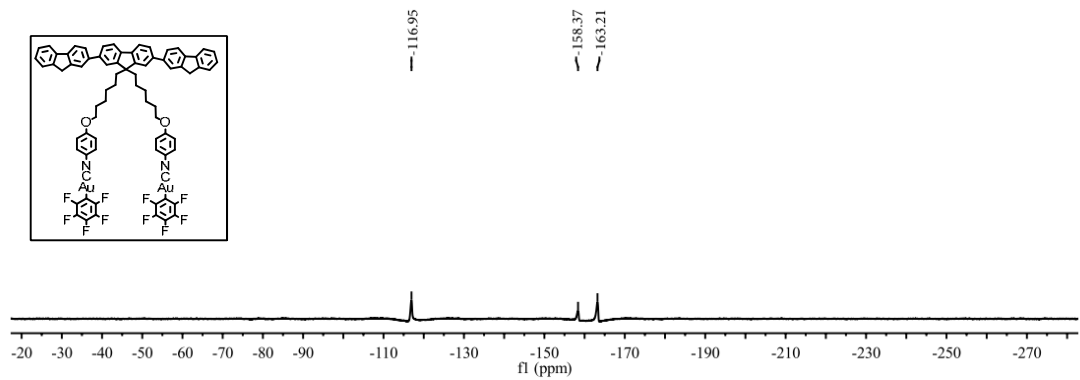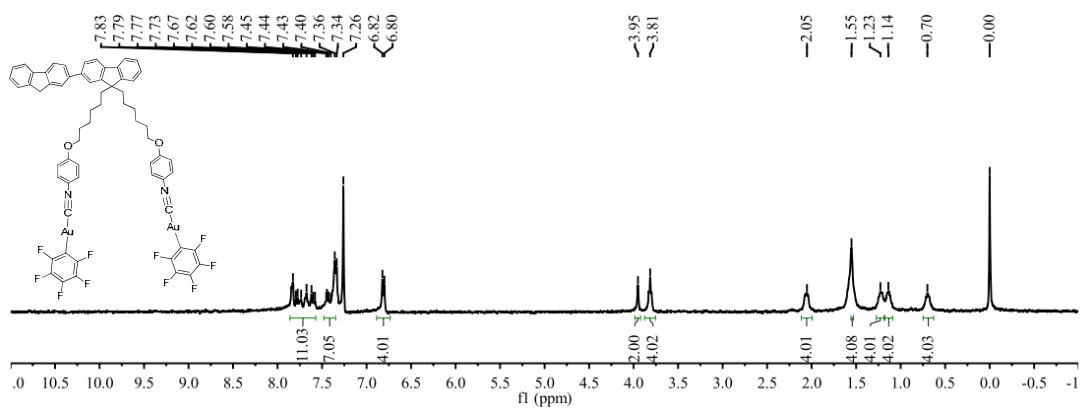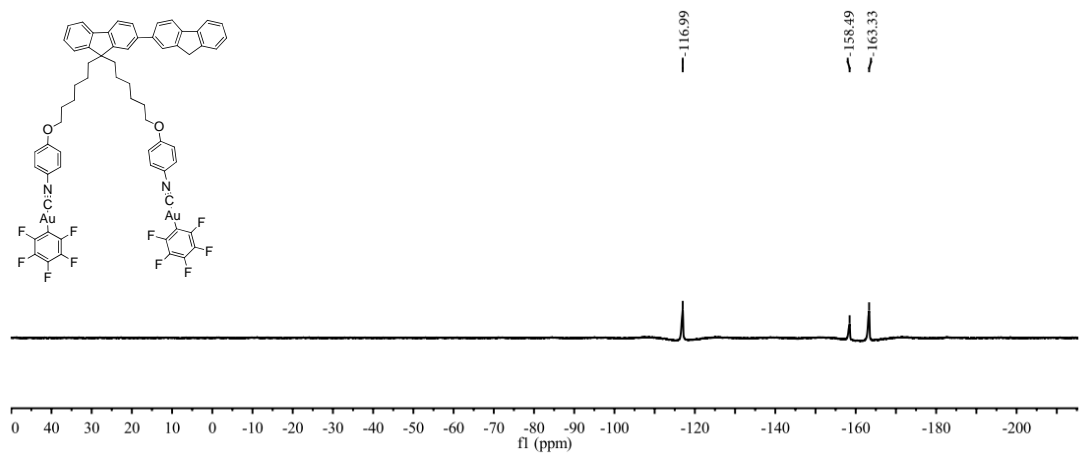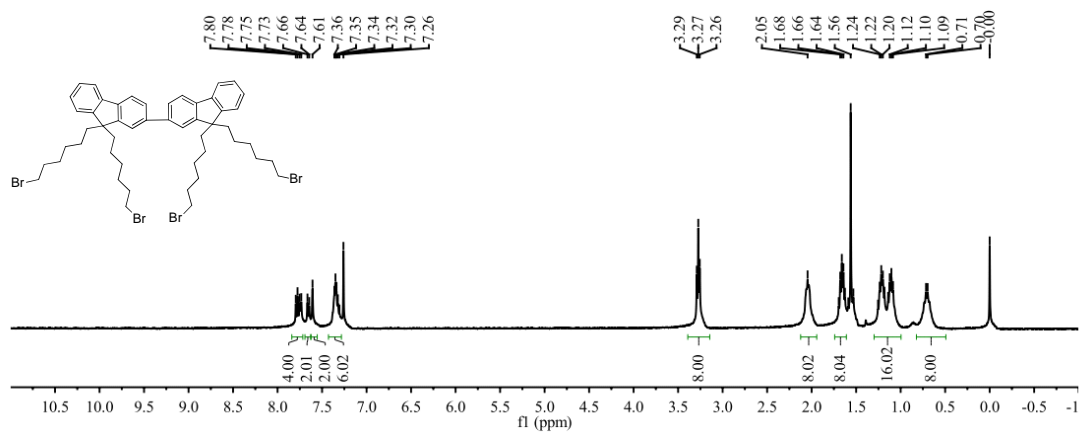

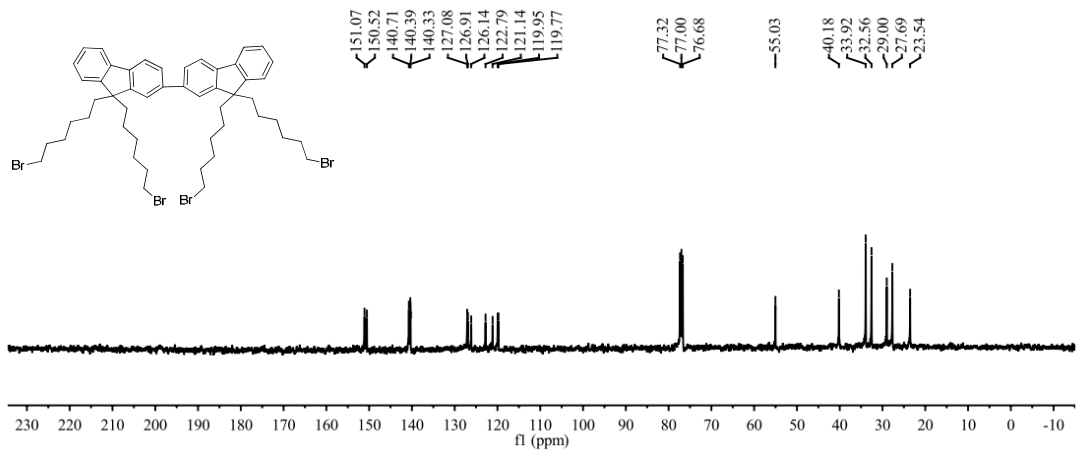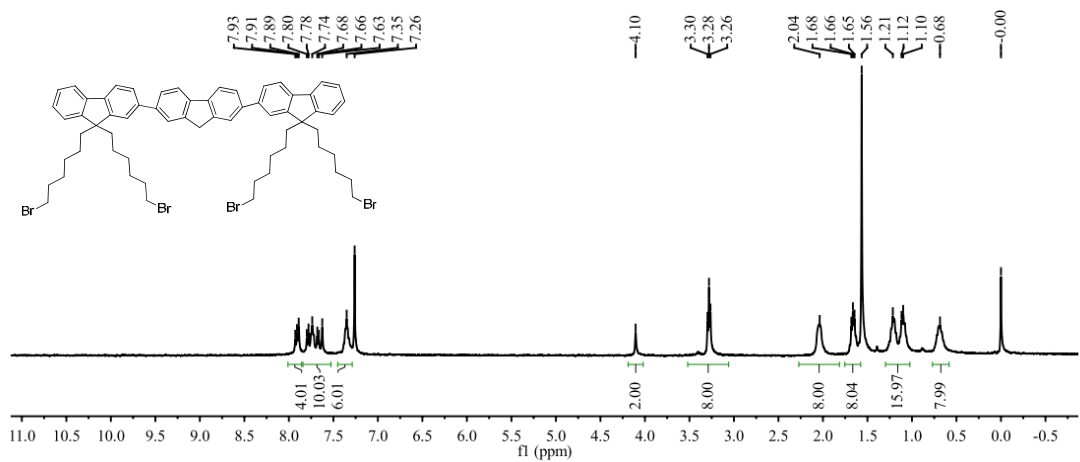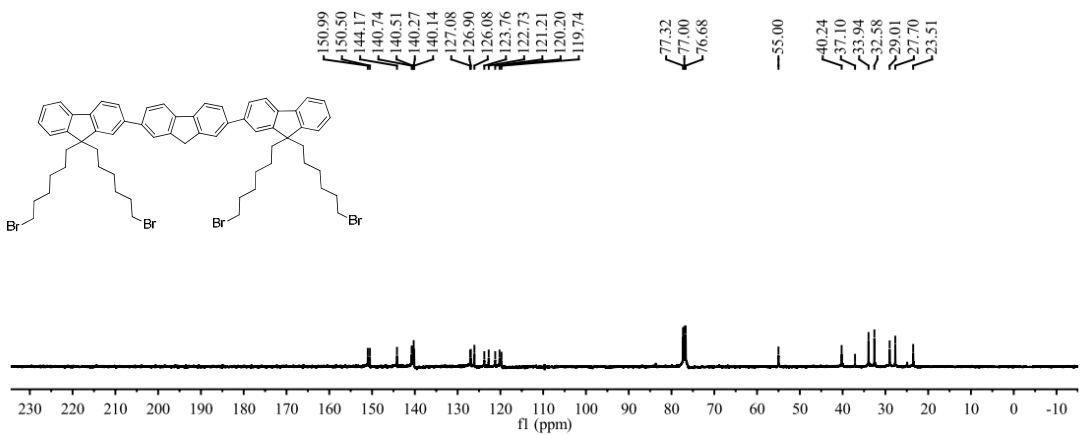

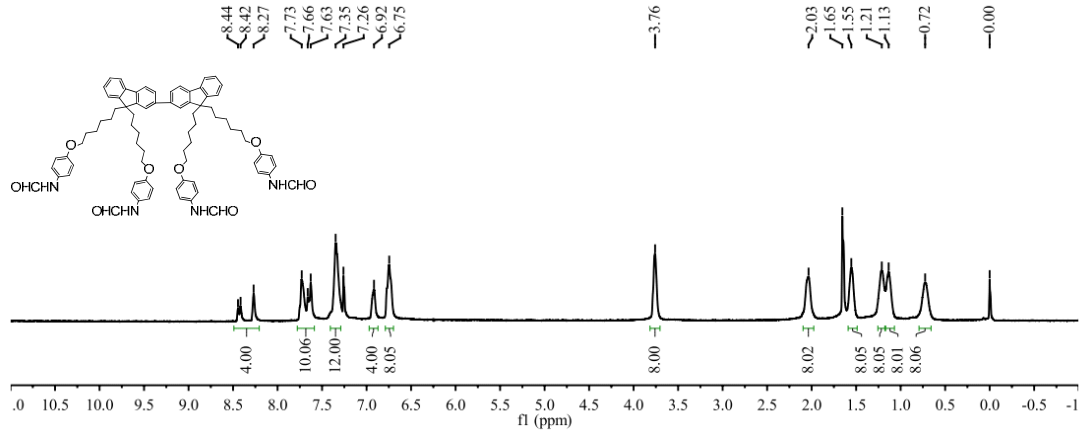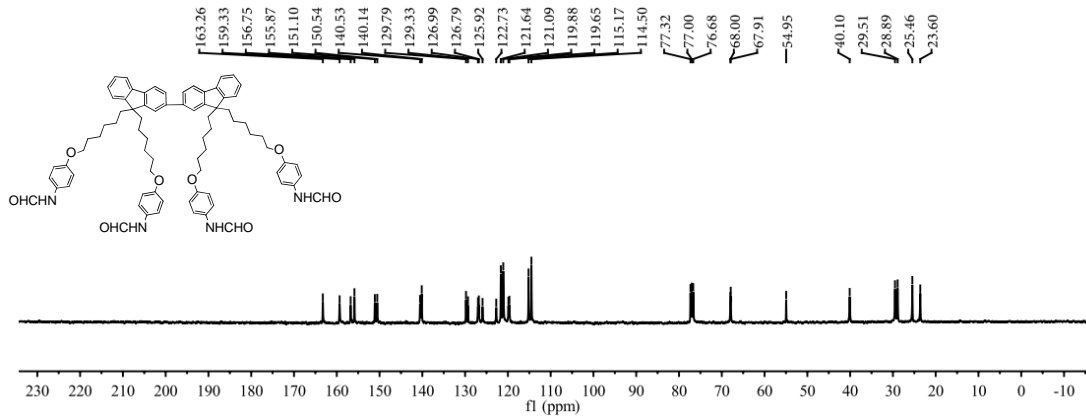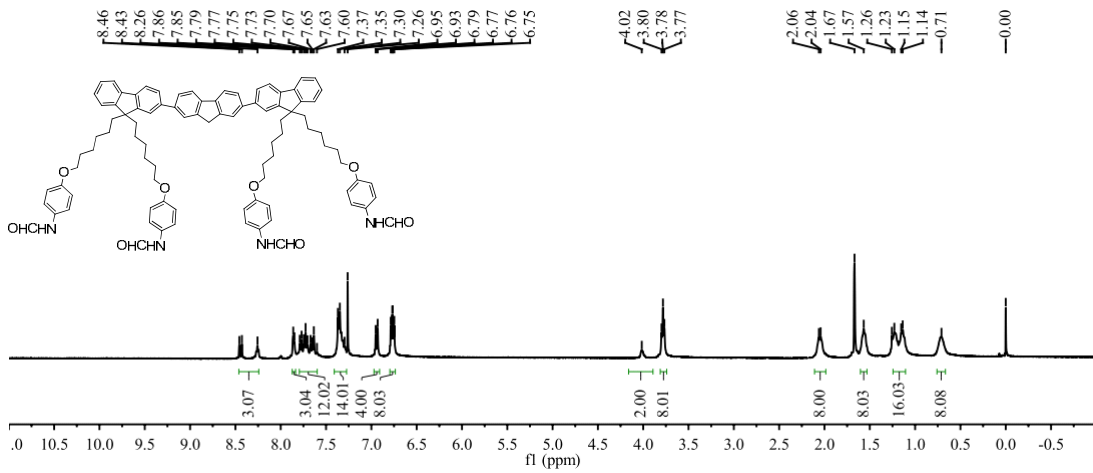



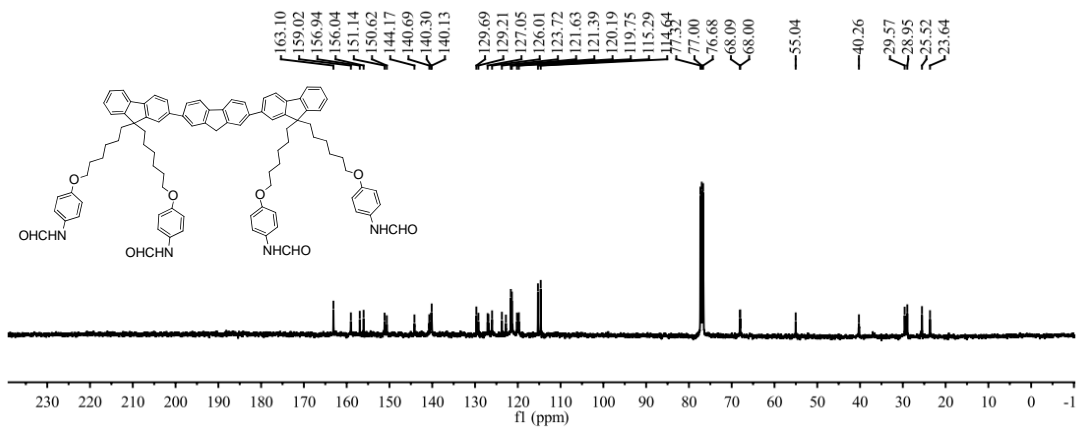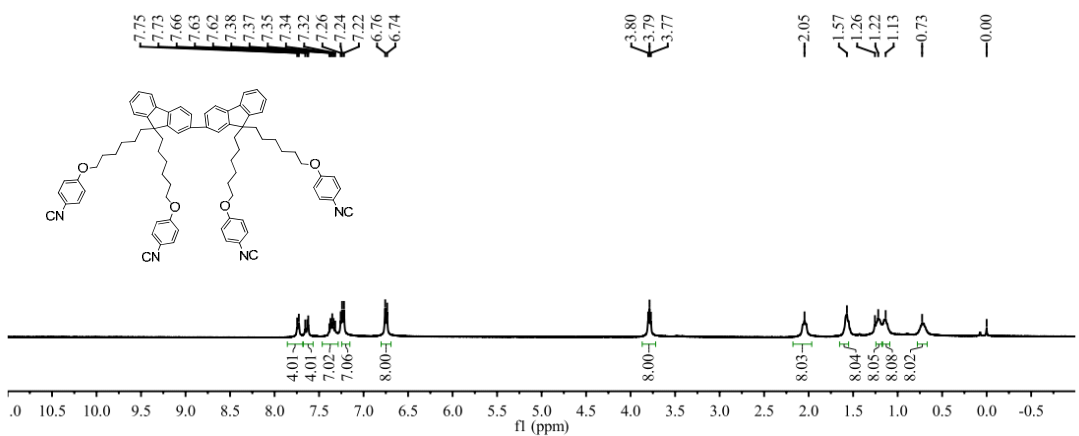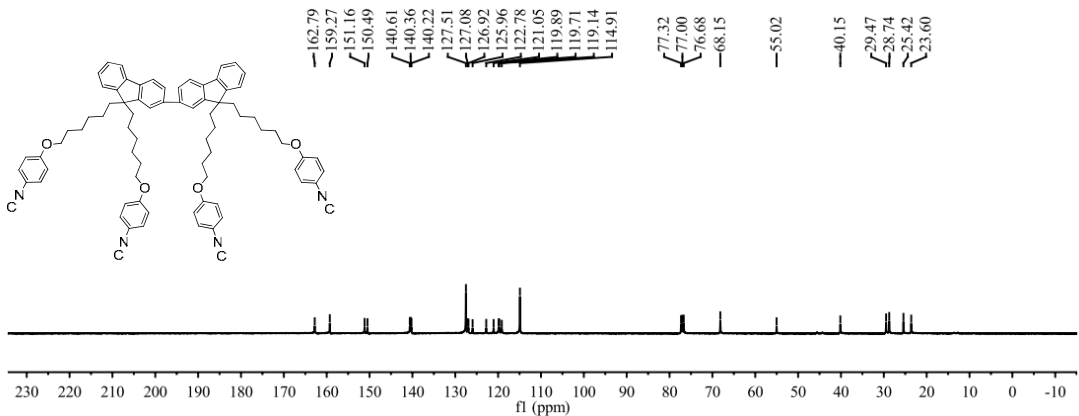

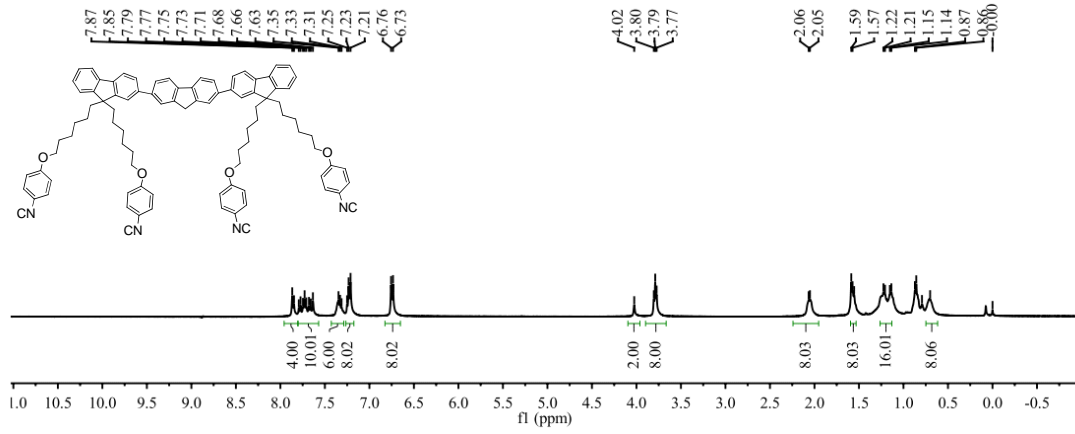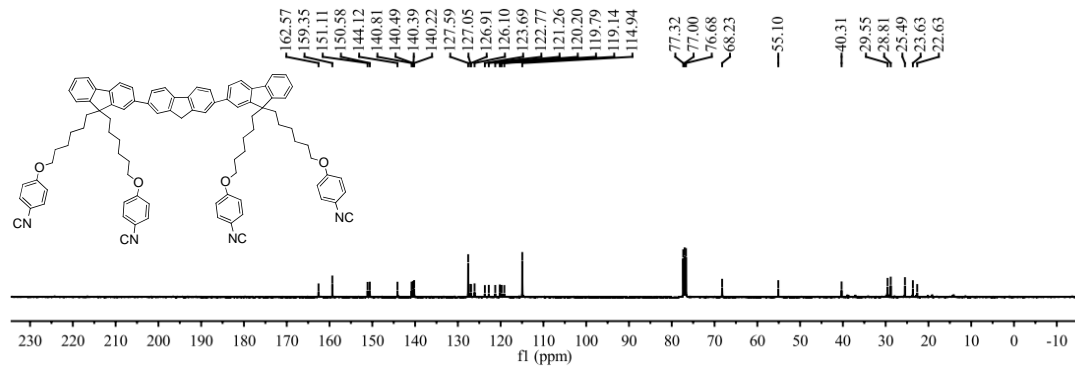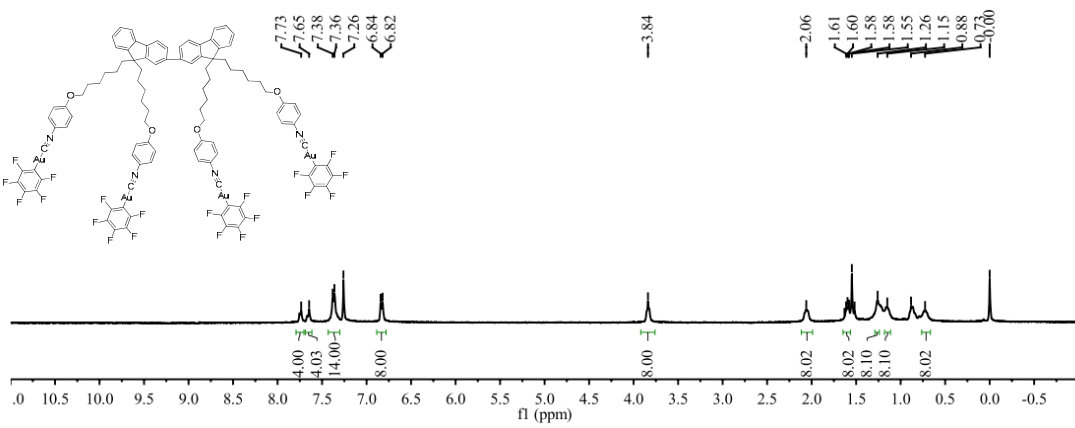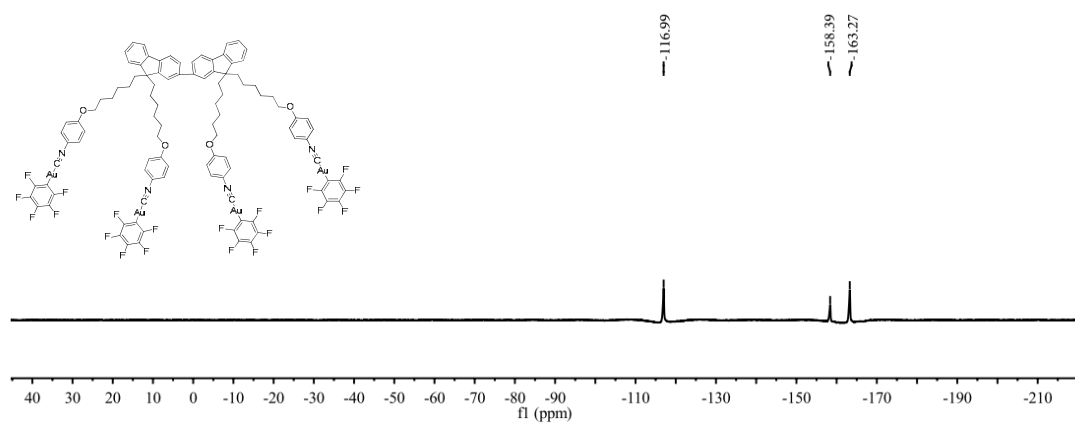

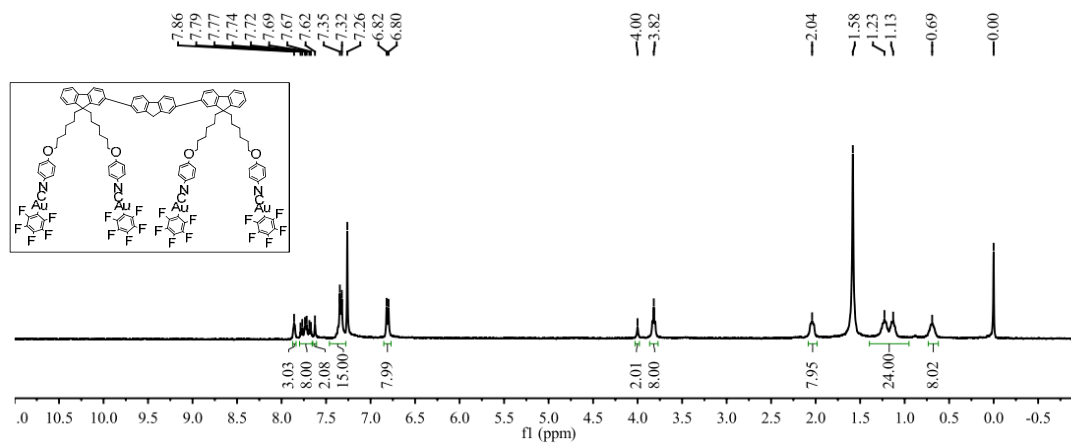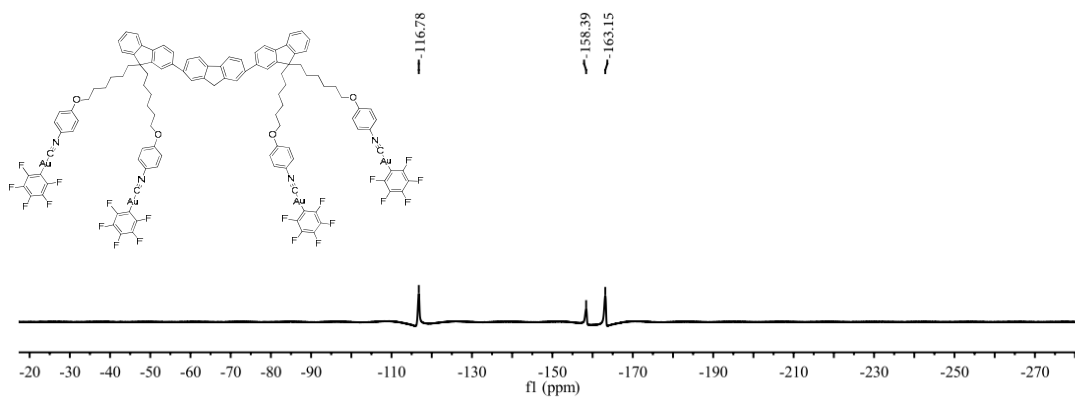

Supplement: c4ra14972f1.pdf [file c4ra14972f1.pdf]
